# Supplementary material
Source: PubMed Central journal article supplement (PMC1242279)

Pathway 1: fast DSB lesion repair

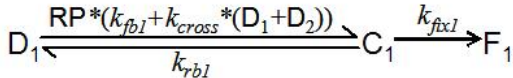

Pathway 2: slow DSB lesion repair:

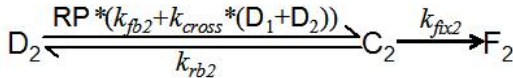

Supplement: pnas_0501352102_1.pdf [file pnas_0501352102_1.pdf]

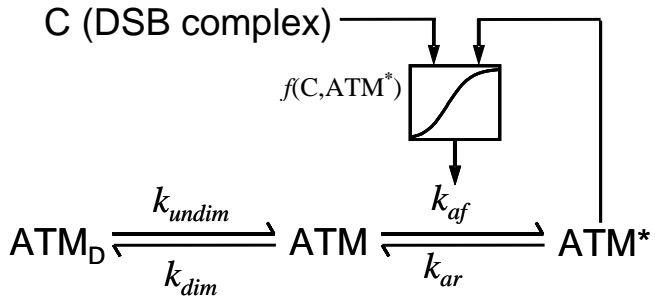

Supplement: pnas_0501352102_2.pdf [file pnas_0501352102_2.pdf]

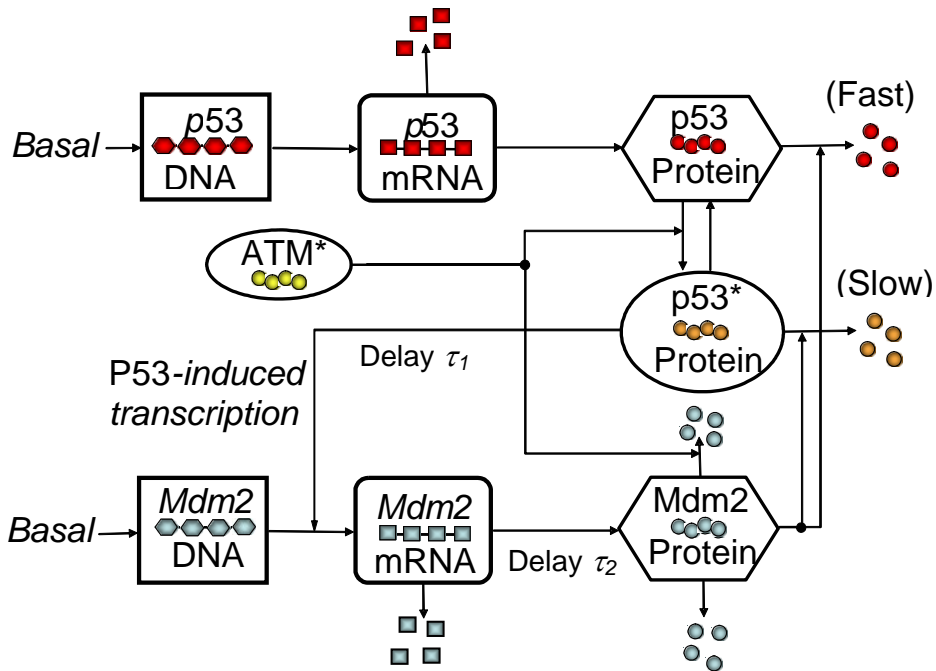

Supplement: pnas_0501352102_3.pdf [file pnas_0501352102_3.pdf]

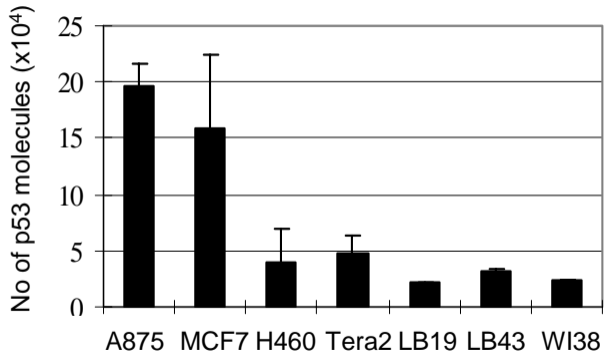

Supplement: pnas_0501352102_4.pdf [file pnas_0501352102_4.pdf]

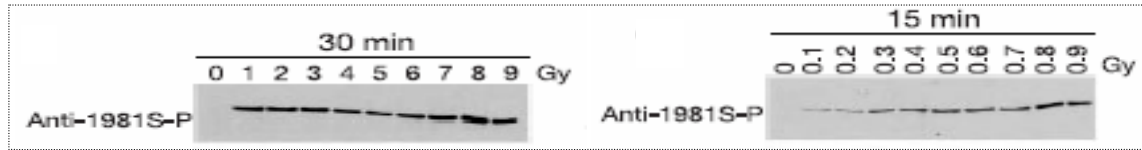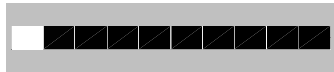

A

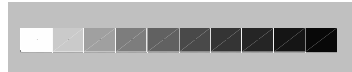

B

Supplement: pnas_0501352102_5.pdf [file pnas_0501352102_5.pdf]

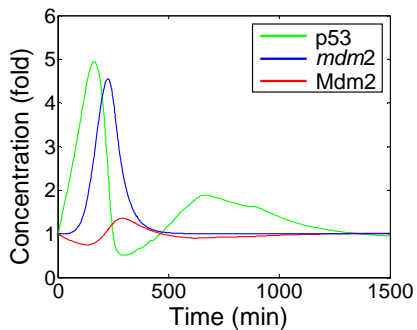

A

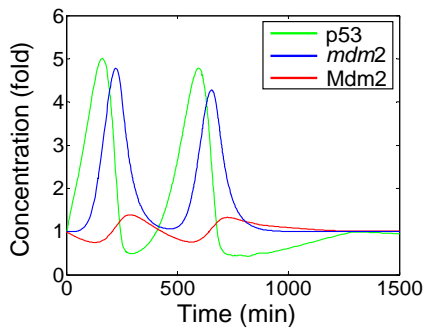

B

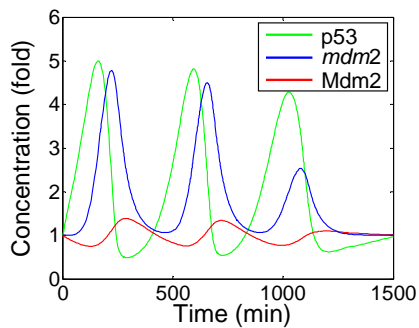

C

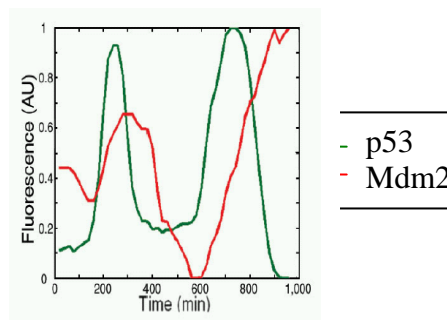

D

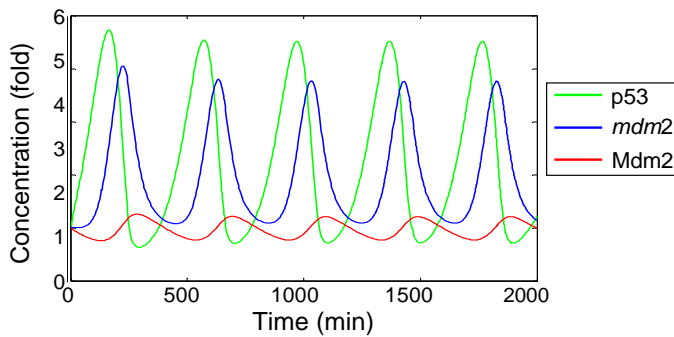

E

Supplement: pnas_0501352102_6.pdf [file pnas_0501352102_6.pdf]

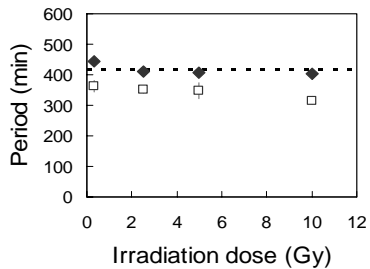

**A**

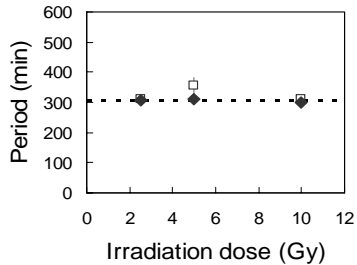

**B**

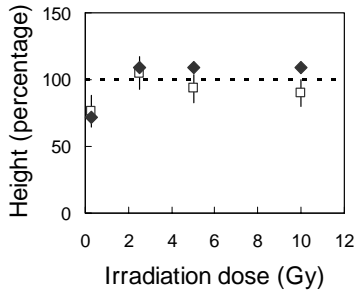

**C**

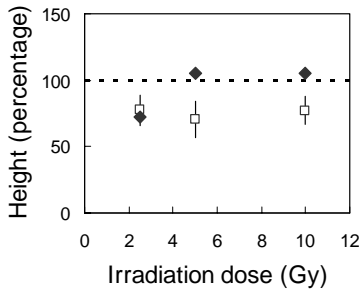

**D**

Supplement: pnas_0501352102_7.pdf [file pnas_0501352102_7.pdf]

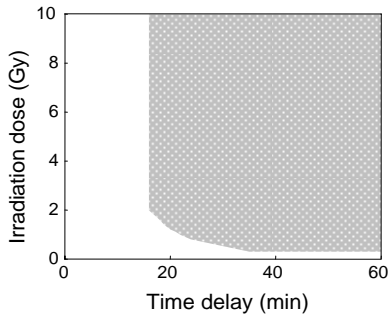

A

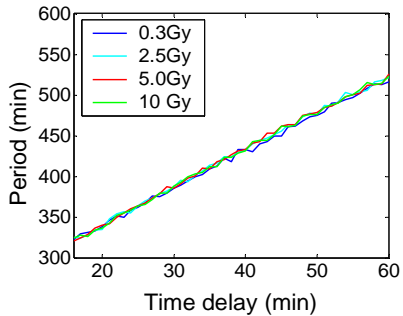

B

Supplement: pnas_0501352102_8.pdf [file pnas_0501352102_8.pdf]

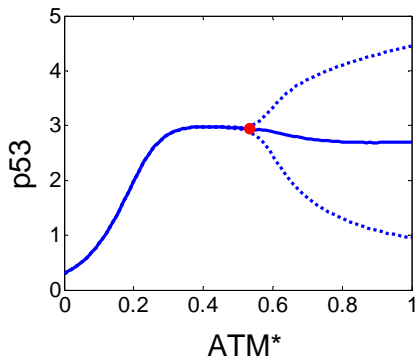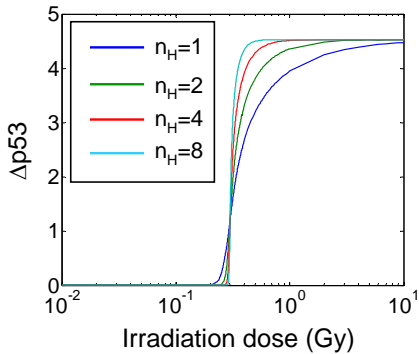

Supplement: pnas_0501352102_9.pdf [file pnas_0501352102_9.pdf]
